# Supplementary material for: Near infrared triggered cascade reactions for photothermal/chemodynamic synergistic therapy
Source: Royal Society of Chemistry journal article supplement (doi:10.1039/d3nj02243a), 2023-01-01
Supplement: d3nj02243a1.pdf [file d3nj02243a1.pdf]

## Near infrared triggered cascade reactions for photothermal/chemodynamic synergistic therapy

Peijing An<sup>a,\*</sup>, Songjinma Yin<sup>a</sup>, Yule Qiang<sup>a</sup>, Fuyi Shui<sup>a</sup>, Qiao Zhang<sup>a</sup>, Congbiao Zhao<sup>a</sup>, Haipin Zhou<sup>a</sup>, Fenyu Yu<sup>b</sup>

a: School of Materials and Chemical Engineering, Chuzhou University, Chuzhou, Anhui 239000, PR China

b: Anhui Jinbang Pharmaceutical and Chemical Co. Ltd., Chuzhou, Anhui 239200, PR China

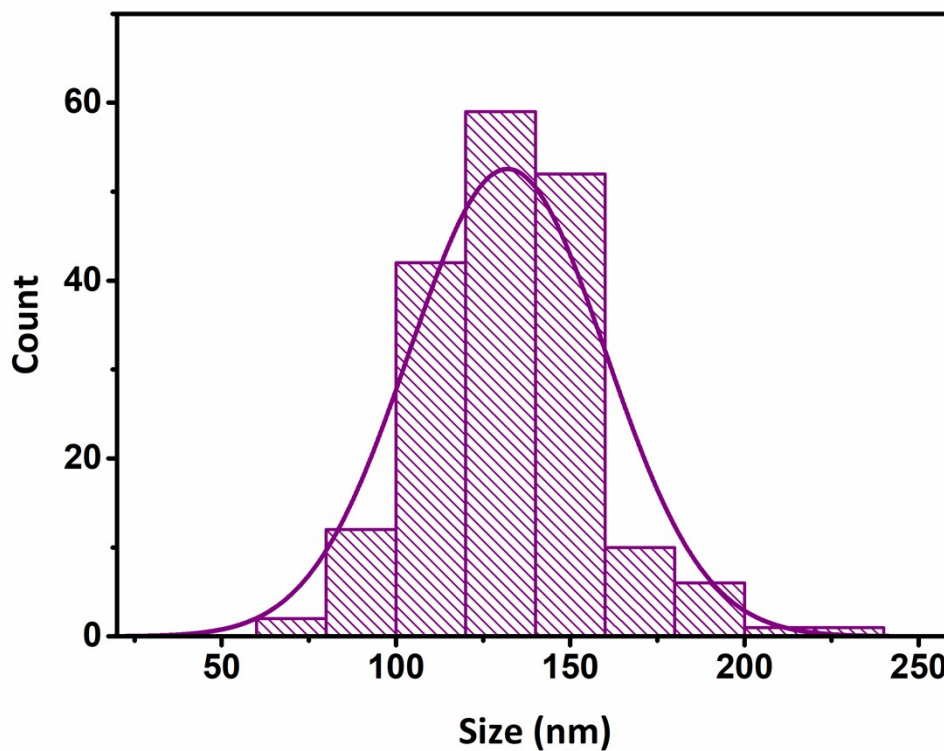

Figure S1. Particle size distribution of HMC nanoparticles.

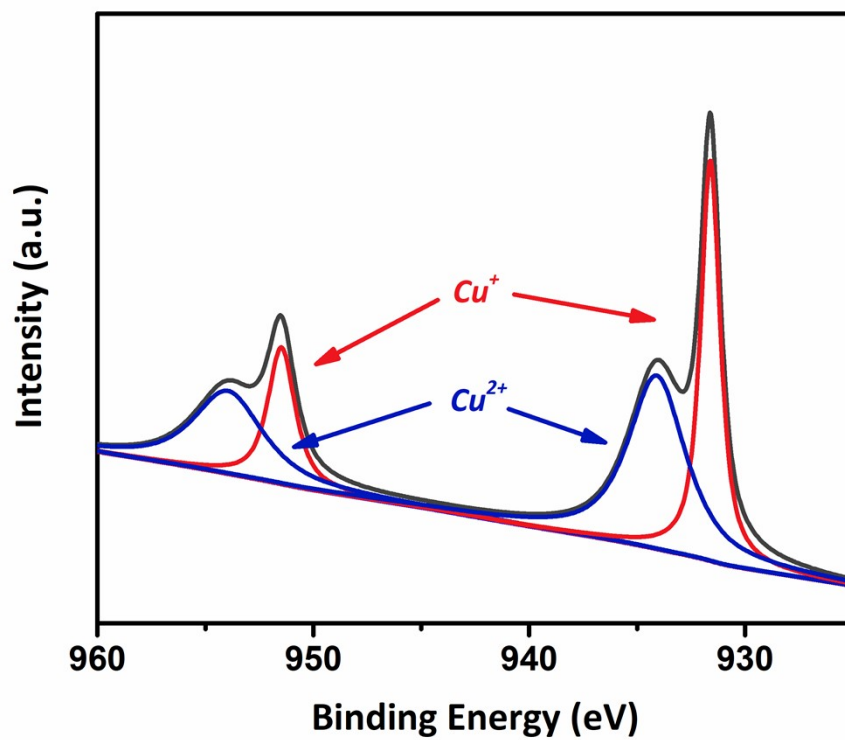

Figure S2. Cu 2p high-resolution XPS spectrum of HMC nanoparticles.

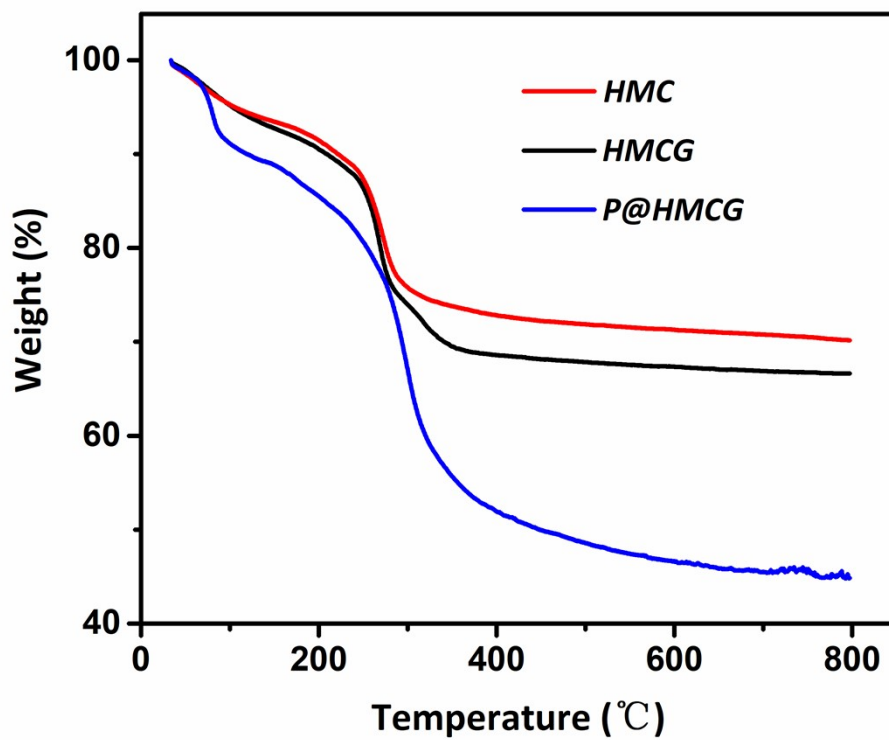

Figure S3. TGA diagrams of MC, HMCG and P@HMCG nanoparticles.

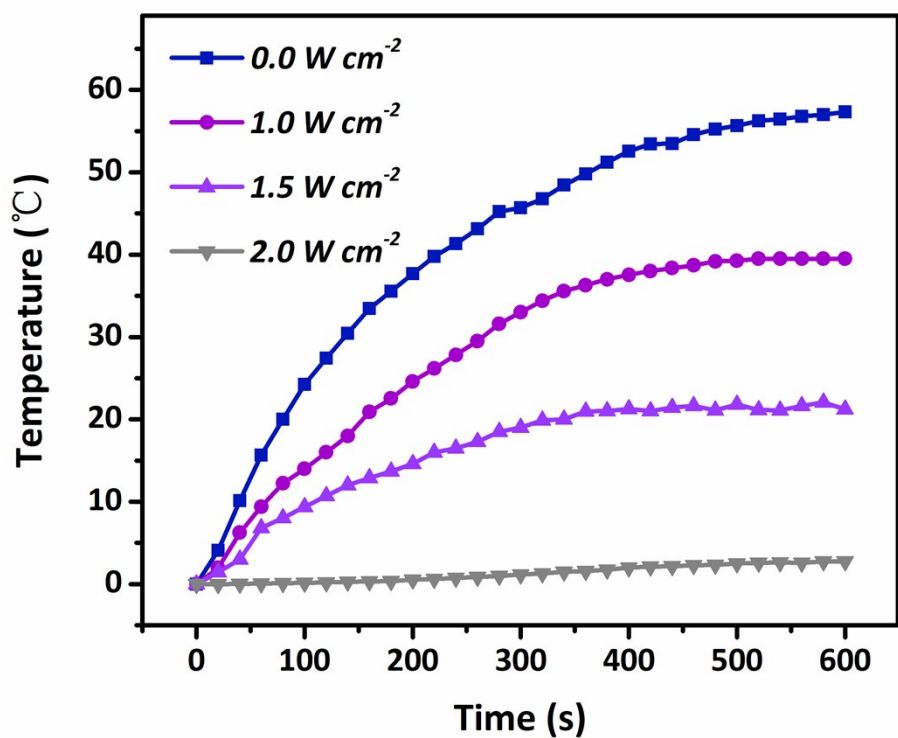

Figure S4. Under the irradiation of 808 nm near-infrared laser with different intensities, the temperature curve of HMC suspension was obtained.

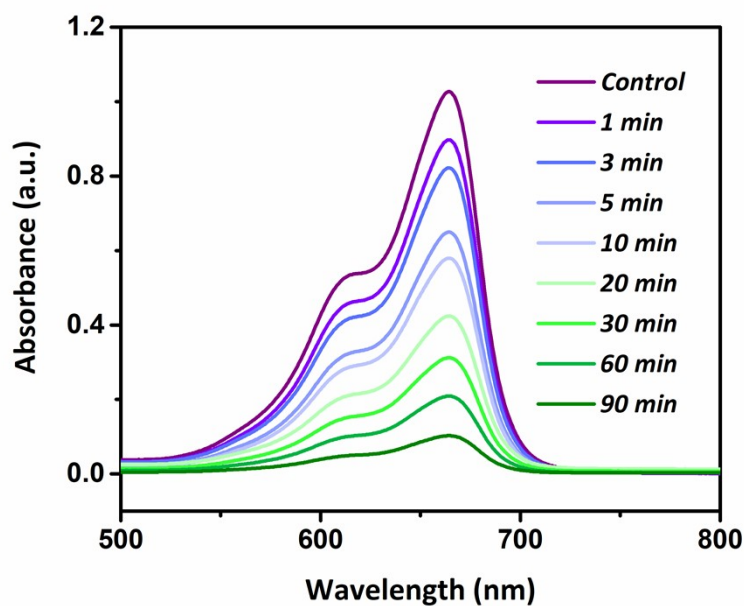

Figure S5. Ultraviolet-visible absorption spectra of MB degraded by Cu<sup>+</sup> mediated Fenton-like reaction over time.

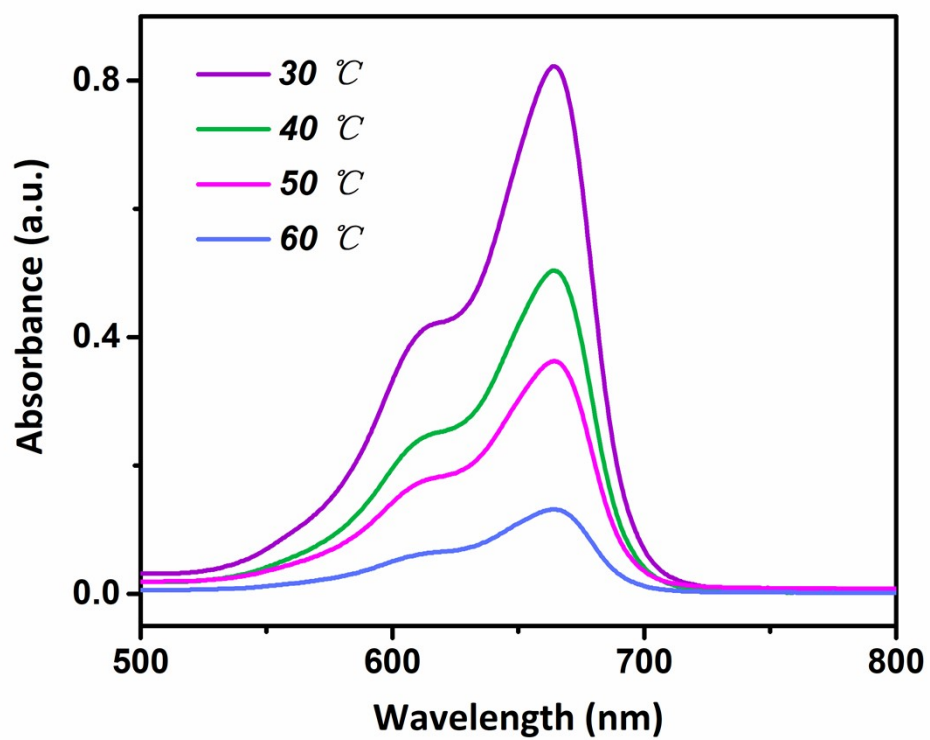

Figure S6. Ultraviolet-visible absorption spectra of MB degraded by Cu<sup>+</sup> mediated Fenton-like reaction at different temperatures.

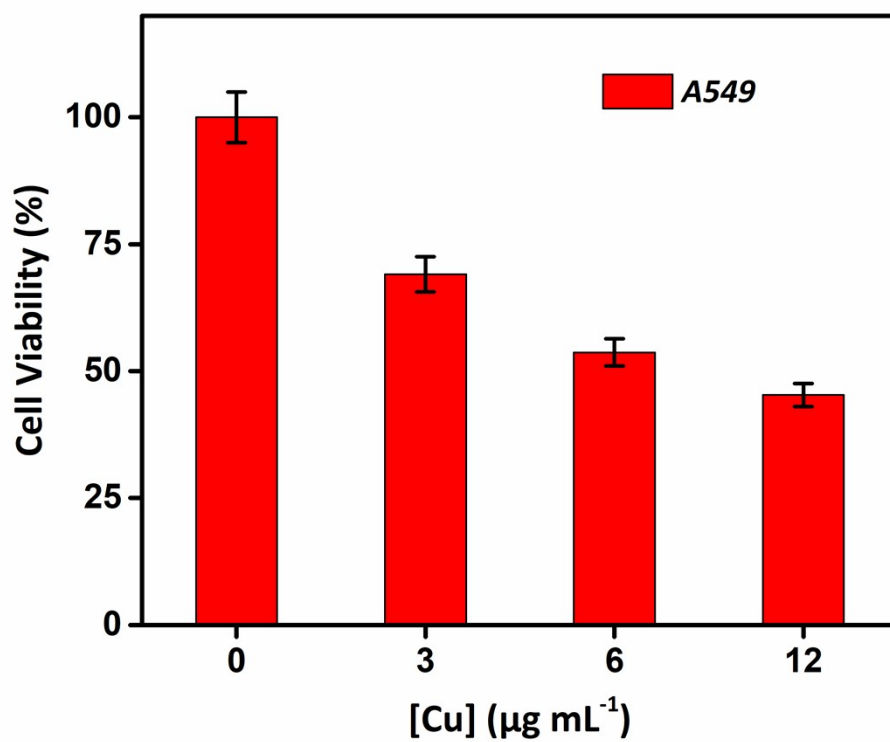

Figure S7. After 24 hours of incubation with different concentrations of Cu<sup>2+</sup>, the survival rate of A-549 cells.

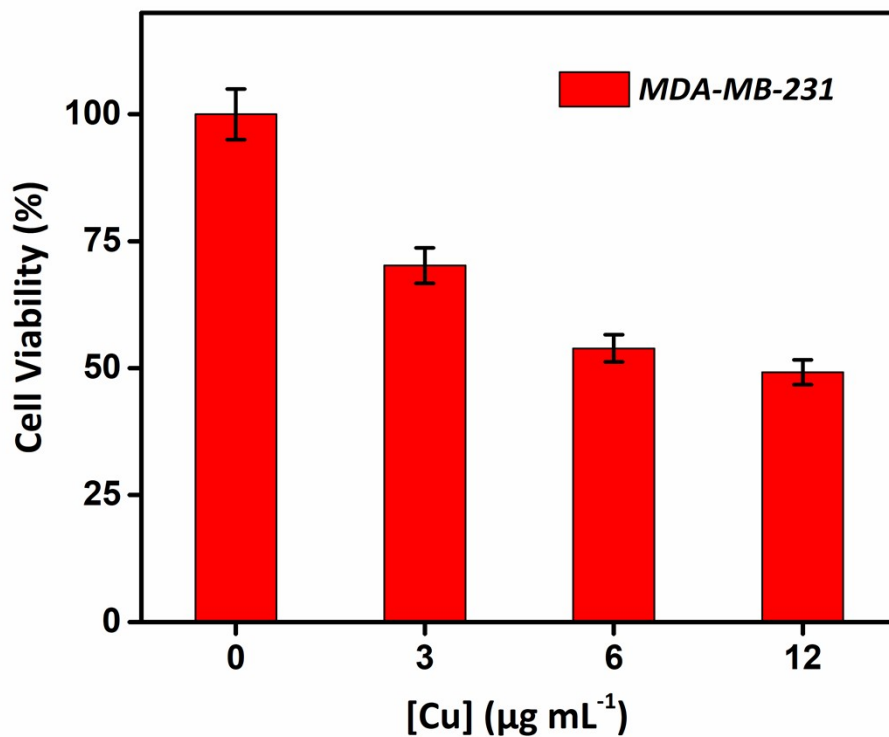

Figure S8. After 24 hours of incubation with different concentrations of Cu<sup>2+</sup>, the survival rate of MDA-MB-231 cells.

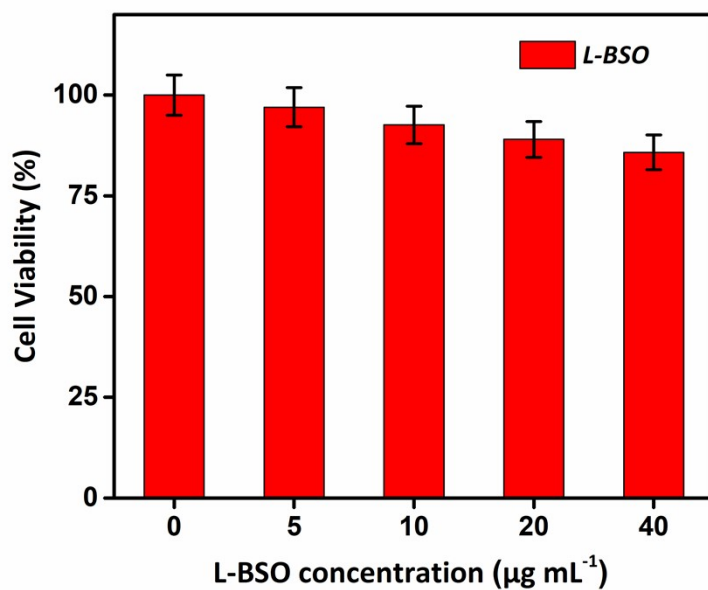

Figure S9. Survival rate of MCF-7 cells after incubation with different concentrations of L-BSO.

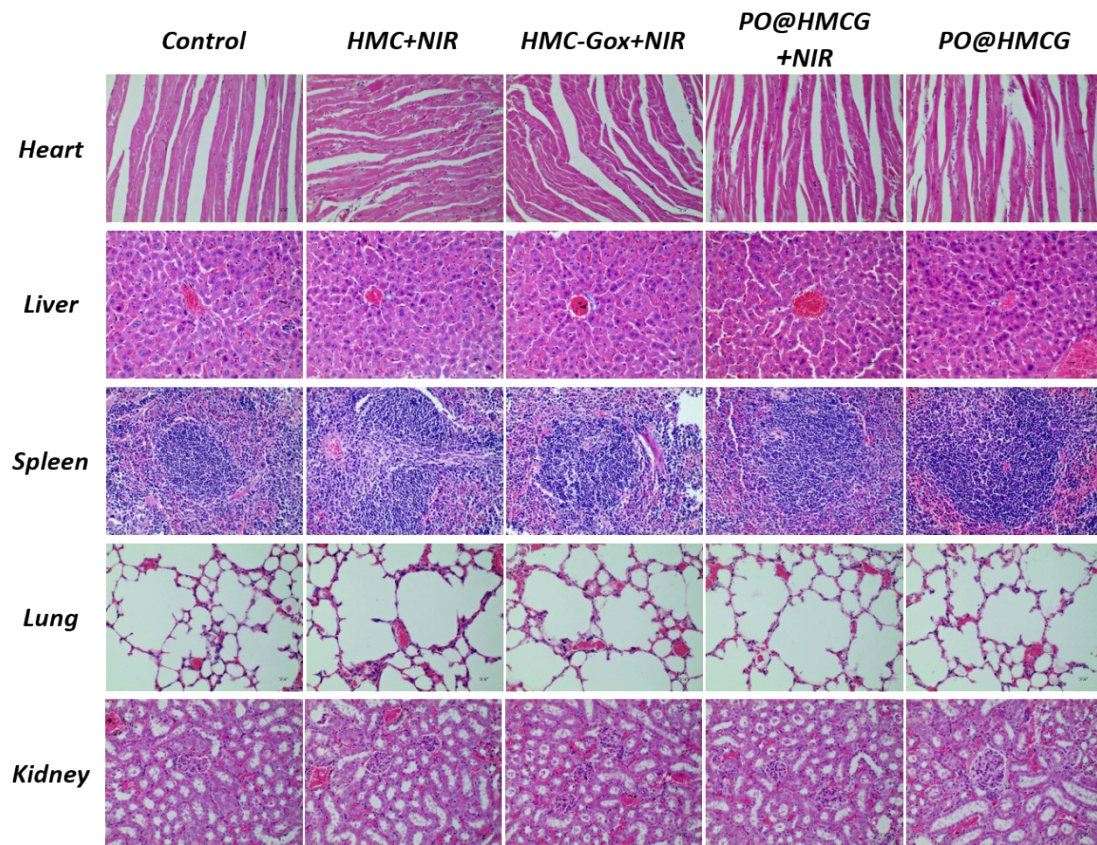

Figure S10. After the treatment, H&E stained images of organ sections of each group. (scale bar: 100  $\mu$ m)
